# Supplementary material for: Prevalence and clinical characteristics of uveitic glaucoma: multicentric study in Bogotá, Colombia
Source: PubMed Central journal article supplement (PMC10920824; doi:10.1038/s41433-023-02757-9), 2023-10-03
Supplement: 41433_2023_2757_MOESM1_ESM.pdf [file 41433_2023_2757_MOESM1_ESM.pdf]

### T1. Complications of uveitis in patients with UG and OHT-SU

| Characteristic                             | N   | UG = 108 (57%) | OHT-SU= 83 (43%) | P-value <sup>a</sup> |
|--------------------------------------------|-----|----------------|------------------|----------------------|
| Corneal edema                              | 191 | 17 (16%)       | 4 (4.8%)         | <b>0.017</b>         |
| Posterior vitreous detachment              | 191 | 38 (35%)       | 27 (33%)         | 0.7                  |
| Macular edema                              | 191 | 22 (20%)       | 19 (23%)         | 0.67                 |
| Epiretinal membrane                        | 191 | 22 (20%)       | 12 (14%)         | 0.29                 |
| Keratic precipitates                       | 191 | 57 (53%)       | 46 (55%)         | 0.72                 |
| Band keratopathy                           | 191 | 6 (5.6%)       | 4 (4.8%)         | >0.99                |
| Retinal detachment                         | 191 | 13 (12%)       | 12 (14%)         | 0.62                 |
| Vitreous hemorrhage                        | 191 | 5 (4.6%)       | 2 (2.4%)         | 0.7                  |
| Bullous keratopathy                        | 191 | 3 (2.8%)       | 1 (1.2%)         | 0.63                 |
| Anterior synechia                          | 191 | 13 (12%)       | 4 (4.8%)         | 0.082                |
| Posterior synechia                         | 191 | 43 (40%)       | 18 (22%)         | <b>0.008</b>         |
| Retinal neovascularization                 | 191 | 3 (2.8%)       | 2 (2.4%)         | >0.99                |
| Periphlebitis                              | 191 | 1 (0.9%)       | 1 (1.2%)         | >0.99                |
| Retinoschisis                              | 191 | 2 (1.9%)       | 0 (0%)           | 0.51                 |
| Ciliary rotation                           | 191 | 0 (0%)         | 2 (2.4%)         | 0.19                 |
| Neovascularization of the anterior segment | 191 | 7 (6.5%)       | 0 (0%)           | <b>0.019</b>         |
| Iridian nodules                            | 191 | 5 (4.6%)       | 5 (6.0%)         | 0.75                 |

<sup>a</sup> A t-test or Mann–Whitney test was used for continuous variables, and a Chi-square ( $\chi^2$ ) test or Fisher's exact test for categorical variables according to their distribution. Bold= Statistically significant.

## T2. Pediatric uveitic glaucoma and secondary ocular hypertension

| <b>Clinical characteristics</b>               | <b>UG<br/>N=10 (%)</b> | <b>OHT-SU<br/>N=10 (%)</b> |
|-----------------------------------------------|------------------------|----------------------------|
| Female                                        | 7 (70%)                | 6 (60%)                    |
| Male                                          | 3 (30%)                | 4 (40%)                    |
| <b>Age of first uveitis episode:</b>          | 7.5 (5.0 - 12.0)       | 5.0 (3.5 - 10.7)           |
| <b>Anatomic Localization</b>                  |                        |                            |
| Anterior                                      | 3 (30%)                | 4 (40%)                    |
| Intermediate                                  | 1 (10%)                | 2 (20%)                    |
| Panuveitis                                    | 6 (60%)                | 4 (40%)                    |
| <b>Etiology</b>                               |                        |                            |
| Autoimmune                                    | 3 (30%)                | 2 (20%)                    |
| Autoinflammatory                              | 0 (0%)                 | 1 (10%)                    |
| Idiopathic                                    | 4 (40%)                | 5 (50%)                    |
| Infectious                                    | 0 (0%)                 | 1 (10%)                    |
| Mixed                                         | 0 (0%)                 | 1 (10%)                    |
| Others                                        | 3 (30%)                | 0 (0%)                     |
| <b>Last visit visual acuity<br/>(logMAR):</b> | 0.3 (0.2- 0.4)         | 0.0 (0.0 - 0.1)            |
| <b>Highest IOP</b>                            | 22 (15.0 - 31.5)       | 29.0 (21.2 - 32.2)         |
| <b>Last visit Cup/Disk ratio</b>              | 0.7 (0.5 - 0.7)        | 0.1 (0.0 - 0.1)            |
| <b>Abnormal OCT</b>                           | 5 (50%)                | 4 (40%)                    |
| <b>Abnormal VF</b>                            | 3 (30%)                | 0 (0%)                     |
| <b># Hypotensive medications</b>              | 2.5 (1.2 - 3.7)        | 1.5 (0.0 - 2.0)            |
| <b>Surgically managed</b>                     | 7 (70%)                | 0 (0%)                     |

### T3. Medical and surgical management used in UG and OHT-SU

| <b>Medical treatment, n= 155 (81.15%)</b> |           |               |
|-------------------------------------------|-----------|---------------|
| <b>Hypotensive</b>                        | <b>UG</b> | <b>OHT-SU</b> |
| Beta-blockers                             | 85        | 62            |
| Topical carbonic anhydrase inhibitor      | 76        | 49            |
| Alpha2-agonist                            | 69        | 39            |
| Oral carbonic anhydrase inhibitor         | 24        | 9             |
| Prostaglandin analogs                     | 20        | 5             |
| <b>Surgical treatment, n= 57 (29.84%)</b> |           |               |
| <b>Surgical procedure</b>                 | <b>UG</b> | <b>OHT-SU</b> |
| Ahmed valve implant                       | 22        | 0             |
| Trabeculectomy                            | 13        | 1             |
| Peripheral iridotomy                      | 13        | 4             |
| Surgical Iridectomy                       | 6         | 1             |
| SLT                                       | 3         | 1             |

### F1. Mean follow-up time for the UG and OHT-SU groups.

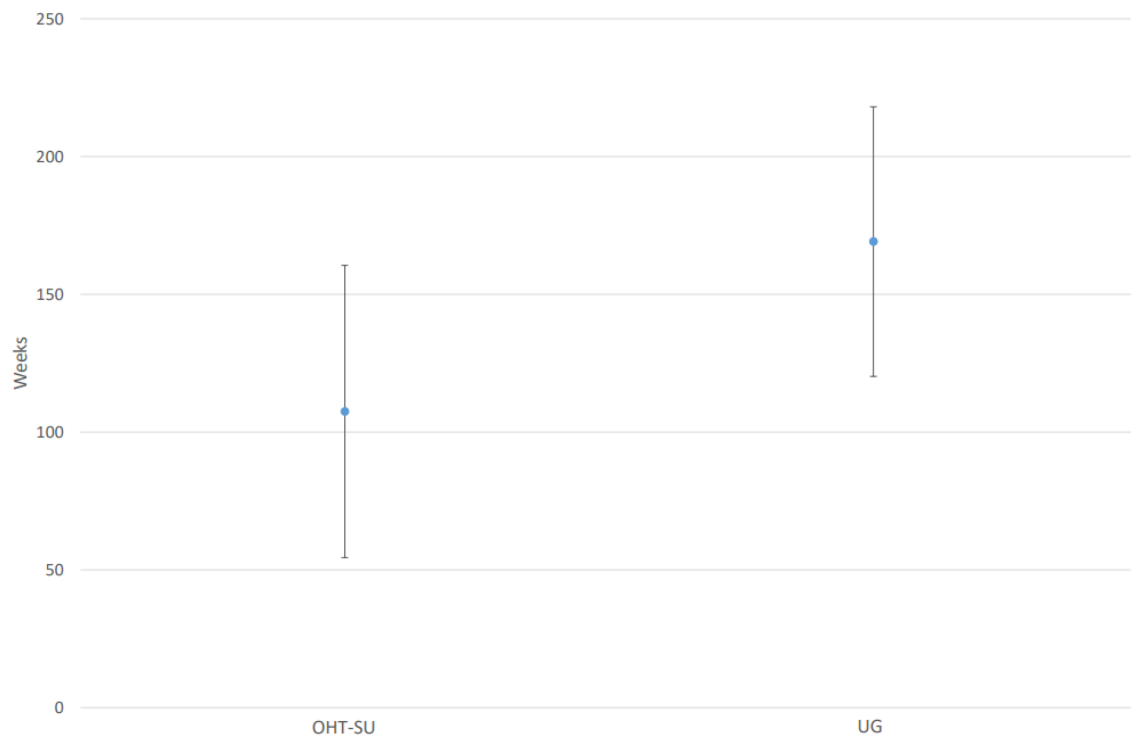

The mean follow-up time was 107.4 weeks in the OHT-SU group vs. 169.1 weeks in the UG group.

$P= 0,07$  (T-test)
